# Supplementary material for: Disease Resistant Bouquet Vine Varieties: Assessment of the Phenolic, Aromatic, and Sensory Potential of Their Wines
Source: PubMed Central journal article supplement (PMC6995519; doi:10.3390/biom9120793), 2019-11-27
Supplement: biomolecules-09-00793-s001.pdf [file biomolecules-09-00793-s001.pdf]

## Supplementary material

**Figure S1.** Sensory evaluation of monovarietal red wines from the new hybrid grape (HG) varieties. \* indicates significance at  $p < 0.05$ .

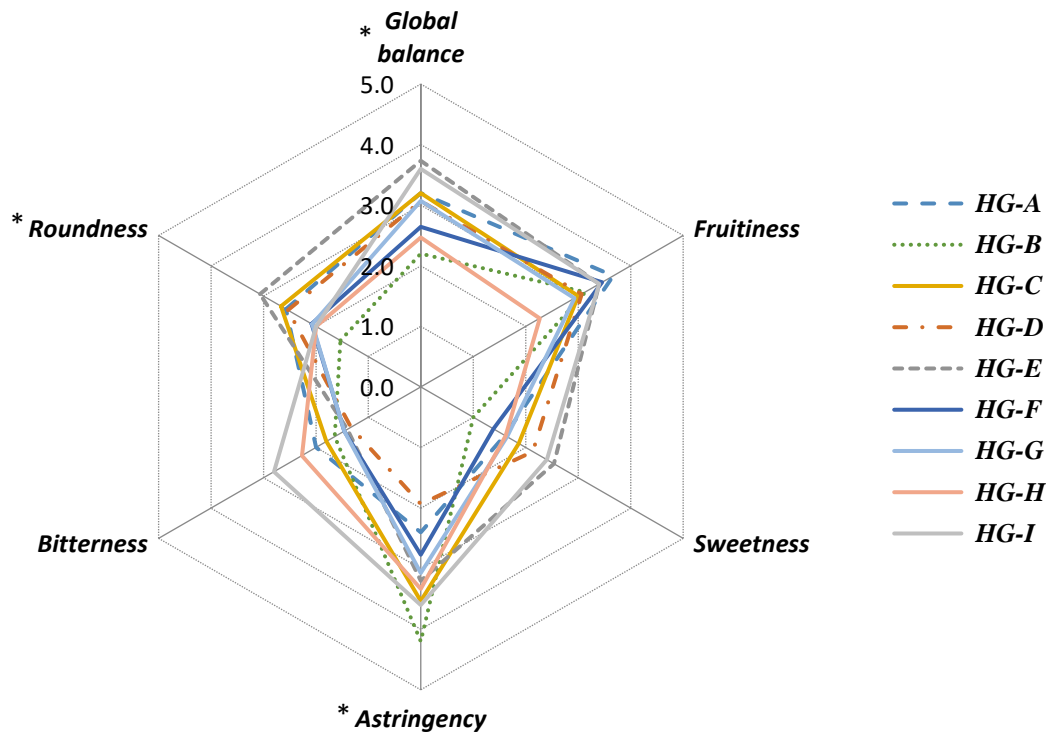

**Table S1.** Oenological and chromatic parameters of monovarietal red wines from the new hybrid grape (HG) varieties.

|                                          | HG-A       | HG-B       | HG-C       | HG-D       | HG-E       | HG-F       | HG-G       | HG-H       | HG-I       |
|------------------------------------------|------------|------------|------------|------------|------------|------------|------------|------------|------------|
| <i>Oenological parameters</i>            |            |            |            |            |            |            |            |            |            |
| Alcoholic degree (%)                     | 11,6 ± 0,0 | 12,5 ± 0,0 | 14,3 ± 0,0 | 12,9 ± 0,0 | 16,6 ± 0,0 | 11,9 ± 0,1 | 12,8 ± 0,0 | 11,6 ± 0,0 | 12,3 ± 0,0 |
| pH                                       | 4,0 ± 0,0  | 3,7 ± 0,0  | 4,0 ± 0,0  | 3,6 ± 0,0  | 4,3 ± 0,0  | 3,5 ± 0,0  | 4,0 ± 0,0  | 3,9 ± 0,0  | 3,9 ± 0,0  |
| TA (g H <sub>2</sub> SO <sub>4</sub> /L) | 2,7 ± 0,0  | 3,1 ± 0,0  | 2,8 ± 0,0  | 2,8 ± 0,0  | 3,2 ± 0,0  | 3,3 ± 0,0  | 2,5 ± 0,0  | 3,0 ± 0,0  | 3,4 ± 0,0  |
| VA (g H <sub>2</sub> SO <sub>4</sub> /L) | 0,4 ± 0,0  | 0,4 ± 0,0  | 0,5 ± 0,0  | 0,3 ± 0,0  | 0,7 ± 0,0  | 0,4 ± 0,0  | 0,4 ± 0,0  | 0,3 ± 0,0  | 0,7 ± 0,0  |
| Density (g/mL)                           | 1,0 ± 0,0  | 1,0 ± 0,0  | 1,0 ± 0,0  | 1,0 ± 0,0  | 1,0 ± 0,0  | 1,0 ± 0,0  | 1,0 ± 0,0  | 1,0 ± 0,0  | 1,0 ± 0,0  |
| Gluc/Fruc                                | 1,9 ± 0,1  | 2,6 ± 0,0  | 3,8 ± 0,0  | 3,1 ± 0,0  | 4,7 ± 0,1  | 2,3 ± 0,1  | 3,2 ± 0,1  | 3,2 ± 0,1  | 1,4 ± 0,1  |
| Malic acid (g/L)                         | 0,2 ± 0,0  | 0,0 ± 0,0  | 0,0 ± 0,0  | 0,0 ± 0,0  | 0,0 ± 0,0  | 0,2 ± 0,0  | 0,0 ± 0,0  | 0,1 ± 0,0  | 0,0 ± 0,0  |
| Lactic acid (g/L)                        | 2,0 ± 0,0  | 1,6 ± 0,0  | 0,9 ± 0,0  | 0,7 ± 0,0  | 1,5 ± 0,0  | 1,0 ± 0,0  | 1,0 ± 0,0  | 1,6 ± 0,0  | 1,0 ± 0,0  |
| Tartaric acid (g/L)                      | 2,0 ± 0,0  | 3,0 ± 0,0  | 1,5 ± 0,0  | 2,3 ± 0,0  | 2,2 ± 0,0  | 2,3 ± 0,0  | 1,3 ± 0,0  | 2,0 ± 0,0  | 1,1 ± 0,0  |
| <i>Chromatic parameters</i>              |            |            |            |            |            |            |            |            |            |
| CI (AU)                                  | 1,1 ± 0,0  | 1,1 ± 0,0  | 1,2 ± 0,0  | 0,5 ± 0,0  | 1,7 ± 0,0  | 0,9 ± 0,0  | 0,6 ± 0,0  | 1,3 ± 0,0  | 1,7 ± 0,0  |
| Hue (AU)                                 | 0,7 ± 0,0  | 0,6 ± 0,0  | 0,6 ± 0,0  | 0,7 ± 0,0  | 0,6 ± 0,0  | 0,6 ± 0,0  | 0,8 ± 0,0  | 0,6 ± 0,0  | 0,8 ± 0,0  |
| % yellow                                 | 37,5 ± 0,3 | 33,7 ± 0,5 | 34,0 ± 0,4 | 37,5 ± 0,4 | 33,8 ± 0,3 | 35,3 ± 0,9 | 39,5 ± 0,1 | 32,0 ± 0,3 | 36,6 ± 0,1 |
| % red                                    | 51,1 ± 0,9 | 55,1 ± 0,8 | 54,4 ± 0,3 | 56,4 ± 0,6 | 52,4 ± 0,3 | 55,5 ± 1,4 | 51,3 ± 0,2 | 56,8 ± 0,4 | 48,7 ± 0,2 |
| % blue                                   | 11,4 ± 0,1 | 11,2 ± 0,3 | 11,6 ± 0,2 | 6,1 ± 0,1  | 13,8 ± 0,2 | 9,2 ± 0,3  | 9,2 ± 0,1  | 11,2 ± 0,1 | 14,7 ± 0,1 |

**Table S2.** Bibliographic data about fruity aroma profile by ester families for monovarietal wines made from international red grape varieties (Cabernet Sauvignon, Merlot, Syrah).

| Bibliographic reference              | Wine characteristics         |              |                         | Ethyl esters of straight-chain fatty acids <sup>a</sup> | Higher alcohol acetates <sup>a</sup> | Ethyl branched acid esters <sup>a</sup> |
|--------------------------------------|------------------------------|--------------|-------------------------|---------------------------------------------------------|--------------------------------------|-----------------------------------------|
|                                      | Geographical origin          | Vintage      | Grape variety           |                                                         |                                      |                                         |
| <i>Antalick et al., 2012</i>         | France, Switzerland          | 2007 - 2009  | CS, Merlot <sup>b</sup> | 1150                                                    | 578                                  | 65                                      |
| <i>Antalick et al., 2015</i>         | Australia                    | no specified | CS                      | 1258 - 1434                                             | 528 - 654                            | 52 - 74                                 |
|                                      |                              |              | Syrah                   | 1470 - 1553                                             | 1403 - 1501                          | 52 - 80                                 |
| <i>Arcari et al., 2017</i>           | Brazil                       | 2008 - 2013  | Merlot                  | 370 - 3814                                              | 39 - 116                             | 41 - 147                                |
| <i>Gammacurta et al., 2014</i>       | Bordeaux (France)            | 2011 - 2012  | CS                      | 546 - 4204                                              | 710 - 7569                           | 25 - 105                                |
|                                      |                              |              | Merlot                  | 672 - 1836                                              | 298 - 878                            | 49 - 81                                 |
| <i>González-Centeno et al., 2016</i> | France, Italy, United States | 2013         | CS                      | 562 - 1531                                              | 310 - 718                            | 80 - 174                                |

CS, Cabernet Sauvignon. <sup>a</sup> Results expressed in µg/L wine. <sup>b</sup> Results are a mean of ester content of both grape varieties

**Table S3.** Fruity volatile profile of monovarietal red wines from the new hybrid grape (HG) varieties. For each individual ester, lower case letters *a–i* show significant differences among hybrid grape varieties ( $p < 0.05$ ).

|                                            | HG-A                 | HG-B                 | HG-C                 | HG-D                  | HG-E                 | HG-F                  | HG-G                 | HG-H                 | HG-I                 |
|--------------------------------------------|----------------------|----------------------|----------------------|-----------------------|----------------------|-----------------------|----------------------|----------------------|----------------------|
| Ethyl esters of straight-chain fatty acids |                      |                      |                      |                       |                      |                       |                      |                      |                      |
| <i>Ethyl propanoate</i>                    | 247,6 ± 3,5 <i>f</i> | 332,0 ± 2,1 <i>c</i> | 318,3 ± 3,6 <i>d</i> | 221,2 ± 7,6 <i>g</i>  | 346,0 ± 5,2 <i>b</i> | 276,6 ± 3,6 <i>e</i>  | 212,2 ± 1,3 <i>g</i> | 184,2 ± 2,1 <i>h</i> | 436,0 ± 7,9 <i>a</i> |
| <i>Ethyl butyrate</i>                      | 101,4 ± 0,2 <i>b</i> | 138,3 ± 1,2 <i>a</i> | 84,8 ± 0,0 <i>d</i>  | 86,1 ± 1,6 <i>d</i>   | 135,6 ± 1,3 <i>a</i> | 78,6 ± 1,5 <i>e</i>   | 57,6 ± 0,2 <i>g</i>  | 59,9 ± 0,5 <i>f</i>  | 98,1 ± 1,2 <i>c</i>  |
| <i>Ethyl hexanoate</i>                     | 130,5 ± 0,3 <i>d</i> | 208,3 ± 1,6 <i>a</i> | 127,2 ± 0,1 <i>d</i> | 129,8 ± 2,8 <i>d</i>  | 110,5 ± 0,5 <i>e</i> | 149,7 ± 2,5 <i>b</i>  | 148,6 ± 0,2 <i>b</i> | 128,0 ± 0,7 <i>d</i> | 136,2 ± 2,8 <i>c</i> |
| <i>Ethyl octanoate</i>                     | 196,5 ± 1,3 <i>a</i> | 199,5 ± 1,0 <i>a</i> | 105,2 ± 0,7 <i>e</i> | 130,2 ± 3,4 <i>b</i>  | 107,3 ± 0,6 <i>e</i> | 113,6 ± 0,7 <i>d</i>  | 86,5 ± 0,6 <i>f</i>  | 122,9 ± 0,1 <i>c</i> | 135,3 ± 4,1 <i>b</i> |
| <i>Ethyl decanoate</i>                     | 65,9 ± 1,0 <i>a</i>  | 49,5 ± 1,1 <i>b</i>  | 45,6 ± 0,5 <i>c</i>  | 40,5 ± 0,8 <i>d</i>   | 38,4 ± 0,3 <i>d</i>  | 35,1 ± 0,4 <i>e</i>   | 24,2 ± 1,1 <i>f</i>  | 41,1 ± 1,4 <i>d</i>  | 40,8 ± 1,7 <i>d</i>  |
| <i>Dodecanoate d'éthyle</i>                | 3,2 ± 0,2 <i>b</i>   | 1,7 ± 0,1 <i>e</i>   | 2,0 ± 0,1 <i>d</i>   | 5,4 ± 0,1 <i>a</i>    | 1,6 ± 0,0 <i>e</i>   | 2,7 ± 0,1 <i>c</i>    | 0,6 ± 0,1 <i>g</i>   | 1,2 ± 0,1 <i>f</i>   | 4,7 ± 0,4 <i>a</i>   |
| Higher alcohol acetates                    |                      |                      |                      |                       |                      |                       |                      |                      |                      |
| <i>Propyl acetate</i>                      | 30,9 ± 0,7 <i>e</i>  | 54,2 ± 0,3 <i>b</i>  | 35,9 ± 0,2 <i>d</i>  | 15,6 ± 0,7 <i>g</i>   | 72,9 ± 0,5 <i>a</i>  | 42,6 ± 1,1 <i>c</i>   | 18,0 ± 0,3 <i>f</i>  | 11,0 ± 0,1 <i>h</i>  | 42,3 ± 1,8 <i>c</i>  |
| <i>Isobutyl acetate</i>                    | 27,6 ± 0,2 <i>d</i>  | 41,3 ± 0,0 <i>c</i>  | 24,9 ± 0,1 <i>e</i>  | 22,0 ± 0,7 <i>g</i>   | 48,3 ± 0,2 <i>b</i>  | 23,2 ± 0,3 <i>f</i>   | 28,1 ± 0,2 <i>d</i>  | 24,2 ± 0,0 <i>ef</i> | 51,1 ± 0,8 <i>a</i>  |
| <i>Butyl acetate</i>                       | 1,1 ± 0,0 <i>e</i>   | 0,9 ± 0,1 <i>f</i>   | 2,3 ± 0,1 <i>b</i>   | 1,1 ± 0,1 <i>e</i>    | 3,1 ± 0,2 <i>a</i>   | 1,1 ± 0,1 <i>e</i>    | 1,3 ± 0,1 <i>d</i>   | 1,0 ± 0,0 <i>e</i>   | 1,6 ± 0,0 <i>c</i>   |
| <i>Isoamyl acetate</i>                     | 199,0 ± 1,8 <i>d</i> | 175,9 ± 1,7 <i>e</i> | 316,9 ± 3,2 <i>a</i> | 186,2 ± 2,9 <i>de</i> | 265,6 ± 3,6 <i>b</i> | 173,2 ± 16,1 <i>e</i> | 306,3 ± 0,4 <i>a</i> | 267,5 ± 0,3 <i>b</i> | 233,7 ± 1,3 <i>c</i> |
| Ethyl esters branched acids                |                      |                      |                      |                       |                      |                       |                      |                      |                      |
| <i>Ethyl isobutyrate</i>                   | 78,8 ± 0,1 <i>e</i>  | 181,5 ± 0,1 <i>b</i> | 73,3 ± 0,7 <i>f</i>  | 74,0 ± 0,1 <i>f</i>   | 86,4 ± 0,9 <i>d</i>  | 165,5 ± 3,2 <i>c</i>  | 64,7 ± 0,3 <i>g</i>  | 79,4 ± 0,2 <i>e</i>  | 402,4 ± 3,0 <i>a</i> |
| <i>Ethyl 2-methylbutanoate</i>             | 8,7 ± 0,1 <i>h</i>   | 16,7 ± 0,0 <i>c</i>  | 11,8 ± 0,1 <i>f</i>  | 12,4 ± 0,1 <i>e</i>   | 10,2 ± 0,1 <i>g</i>  | 19,7 ± 0,0 <i>b</i>   | 8,5 ± 0,0 <i>i</i>   | 16,0 ± 0,0 <i>d</i>  | 47,6 ± 0,4 <i>a</i>  |
| <i>Ethyl 3-methylbutanoate</i>             | 8,8 ± 0,1 <i>f</i>   | 30,7 ± 0,2 <i>b</i>  | 13,3 ± 0,0 <i>d</i>  | 12,9 ± 0,2 <i>d</i>   | 11,0 ± 0,5 <i>e</i>  | 21,8 ± 0,9 <i>c</i>   | 8,5 ± 0,0 <i>f</i>   | 11,2 ± 0,1 <i>e</i>  | 50,1 ± 0,5 <i>a</i>  |

All results are expressed in µg/L wine. HG, hybrid grape. Letters *a–i* following the values in each row show the significant differences among hybrid grape varieties ( $p < 0.05$ ).
